# Supplementary material
Source: PubMed Central journal article supplement (PMC9194776)
Supplement: NIHMS1800555-supplement-Supp__Figure_1__Tables_1-11__13.pdf [file NIHMS1800555-supplement-Supp__Figure_1__Tables_1-11__13.pdf]

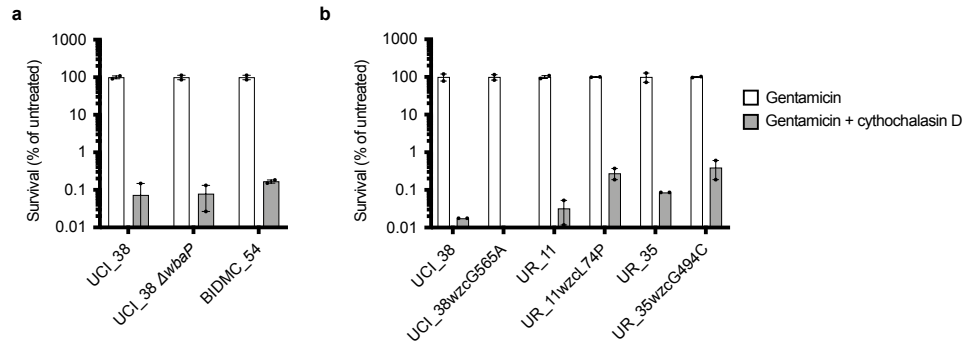

**Supplementary Figure 1 | Cytochalasin D pretreatment of bladder epithelial cells and macrophages substantially reduces the recovery of clinical *K. pneumoniae* isolates from gentamicin and amikacin protection assays.** 5637 Bladder epithelial cells and J774 macrophages were pretreated with cytochalasin D (1  $\mu\text{g/ml}$ ) for 30 minutes prior to infection with gentamicin and amikacin-susceptible *K. pneumoniae* isolates and mutants that had been used in gentamicin protection assays in this study. **a**, Cytochalasin D pretreatment substantially reduces the recovery of all tested *K. pneumoniae* strains from bladder epithelial cells in the gentamicin protection assay, confirming that gentamicin was able to effectively kill extracellular clinical isolates. **b**, Cytochalasin D pretreatment substantially reduces the recovery of *K. pneumoniae* from J774 macrophages in the gentamicin protection assay, confirming that gentamicin was able to effectively kill extracellular clinical isolates. Of note amikacin was used instead of gentamicin in the case of UR\_35 because of gentamicin resistance. For a and b, the mean and SEM of n=2 independent experiments is shown.

| Strain          | Isolation site  | ST         | Clade          | Collection                | Isolation date | Mutation                                         | wbaP truncation | Mucoidity          | Bisample ID         |
|-----------------|-----------------|------------|----------------|---------------------------|----------------|--------------------------------------------------|-----------------|--------------------|---------------------|
| UCI_61          | urine           | 258        | Clade 1        | Irvine Prospective        | 2013           |                                                  |                 | mucoid             | SAMN02581267        |
| UCI_22          | sputum          | 258        | Clade 1        | Irvine Prospective        | 2013           |                                                  |                 | mucoid             | SAMN02356602        |
| MGH_71          | urine           | 258        | Clade 1        | Boston Prospective        | Jun-13         | wbaP:ISKpn26                                     | 359-383         | hypomucoid         | SAMN02581244        |
| MGH_51          | urine           | 258        | Clade 1        | Boston Prospective        | Feb-13         | wbaP:ISKpn26                                     | 331-383         | hypomucoid         | SAMN02581383        |
| UCI_19          | urine           | 258        | Clade 1        | Irvine Prospective        | 2013           |                                                  |                 | mucoid             | SAMN02356599        |
| UCI_63          | wound           | 258        | Clade 1        | Irvine Prospective        | 2013           |                                                  |                 | mucoid             | SAMN02581269        |
| UCI_13          | urine           | 258        | Clade 1        | Irvine Prospective        | 2012           |                                                  |                 | mucoid             | SAMN02138618        |
| UCI_21          | rectal          | 258        | Clade 1        | Irvine Prospective        | 2013           |                                                  |                 | mucoid             | SAMN02356601        |
| UCI_59          | wound           | 258        | Clade 1        | Irvine Prospective        | 2013           |                                                  |                 | mucoid             | SAMN02581263        |
| BIDMC_18B       | urine           | 258        | Clade 1        | Boston Historical         | Dec-10         |                                                  |                 | mucoid             | SAMN02138643        |
| BIDMC_18C       | urine           | 258        | Clade 1        | Boston Historical         | Nov-10         |                                                  |                 | mucoid             | SAMN02138644        |
| BIDMC_18A       | urine           | 258        | Clade 1        | Boston Historical         | May-12         | wzi → wcaH (deletion)                            |                 | hypomucoid         | SAMN02138642        |
| BIDMC_45        | urine           | 258        | Clade 1        | Boston Prospective        | Feb-13         |                                                  |                 | mucoid             | SAMN02356594        |
| BIDMC_34        | urine           | 258        | Clade 1        | Boston Prospective        | Sep-12         | wzi → wzc (deletion)                             |                 | hypomucoid         | SAMN02138665        |
| MGH_29          | respiratory     | 258        | Clade 1        | Boston Prospective        | Sep-12         |                                                  |                 | mucoid             | SAMN02138569        |
| BWH_22          | urine           | 258        | Clade 1        | Boston Historical         | Jun-12         |                                                  |                 | mucoid             | SAMN02138591        |
| MGH_45          | urine           | 1084       | Clade 1        | Boston Prospective        | Oct-12         | act:ISKpn26                                      |                 | mucoid             | SAMN02138585        |
| UCI_33          | urine           | 258        | Clade 2        | Irvine Prospective        | 2013           |                                                  |                 | mucoid             | SAMN02356613        |
| UCI_55          | wound           | 258        | Clade 2        | Irvine Prospective        | 2013           |                                                  |                 | mucoid             | SAMN02581261        |
| UCI_43          | urine           | 258        | Clade 2        | Irvine Prospective        | 2013           | wbaP:IS1294 wzc:IS10R                            | 238-475         | hypomucoid         | SAMN02356623        |
| UCI_44          | urine           | 258        | Clade 2        | Irvine Prospective        | 2013           | wbaP:IS1294 wzc:IS10R                            | 238-475         | hypomucoid         | SAMN02356624        |
| UCI_41          | urine           | 258        | Clade 2        | Irvine Prospective        | 2013           |                                                  |                 | mucoid             | SAMN02356621        |
| <b>UCI_37</b>   | <b>urine</b>    | <b>258</b> | <b>Clade 2</b> | <b>Irvine Prospective</b> | <b>2013</b>    | <b>wbaP:IS1294</b>                               | <b>409-475</b>  | <b>hypomucoid</b>  | <b>SAMN02356617</b> |
| <b>UCI_38</b>   | <b>urine</b>    | <b>258</b> | <b>Clade 2</b> | <b>Irvine Prospective</b> | <b>2013</b>    |                                                  |                 | <b>mucoid</b>      | <b>SAMN02356618</b> |
| UCI_67          | sputum          | 258        | Clade 2        | Irvine Prospective        | 2013           | ugpY502C                                         |                 | mucoid             | SAMN02581273        |
| UCI_1           | sputum          | 258        | Clade 2        | Irvine Prospective        | 2012           | ugpY502C                                         |                 | mucoid             | SAMN02138606        |
| BIDMC_10        | foot culture    | 258        | Clade 2        | Boston Historical         | 2009           |                                                  |                 | mucoid             | SAMN02138631        |
| <b>BIDMC_54</b> | <b>urine</b>    | <b>258</b> | <b>Clade 2</b> | <b>Boston Prospective</b> | <b>Jun-13</b>  | <b>galF → GTF1 (deletion, IS1294)</b>            |                 | <b>hypomucoid</b>  | <b>SAMN02581275</b> |
| BIDMC_42B       | blood           | 258        | Clade 2        | Boston Prospective        | Dec-12         |                                                  |                 | mucoid             | SAMN02356580        |
| BIDMC_42A       | blood           | 258        | Clade 2        | Boston Prospective        | Dec-12         |                                                  |                 | mucoid             | SAMN02356579        |
| BWH_36          | bal             | 258        | Clade 2        | Boston Prospective        | Sep-12         |                                                  |                 | mucoid             | SAMN02138599        |
| BIDMC_7A        | urine           | 258        | Clade 2        | Boston Historical         | Apr-12         |                                                  |                 | mucoid             | SAMN02138627        |
| BIDMC_7B        | urine           | 258        | Clade 2        | Boston Historical         | Apr-12         |                                                  |                 | mucoid             | SAMN02138628        |
| <b>BIDMC_13</b> | <b>blood</b>    | <b>258</b> | <b>Clade 2</b> | <b>Boston Historical</b>  | <b>Nov-09</b>  | <b>wzcG565S (GGT-&gt;AGT)</b>                    |                 | <b>hypermucoid</b> | <b>SAMN02138636</b> |
| BIDMC_2A        | blood           | 258        | Clade 2        | Boston Historical         | May-10         |                                                  |                 | mucoid             | SAMN02138621        |
| <b>BIDMC_16</b> | <b>blood</b>    | <b>258</b> | <b>Clade 2</b> | <b>Boston Historical</b>  | <b>Nov-09</b>  | <b>wzcG565S (GGT-&gt;AGT)</b>                    |                 | <b>hypermucoid</b> | <b>SAMN02138639</b> |
| BIDMC_5         | blood           | 258        | Clade 2        | Boston Historical         | Jul-08         |                                                  |                 | mucoid             | SAMN02138625        |
| BIDMC_4         | tissue, abdomen | 258        | Clade 2        | Boston Historical         | Sep-09         |                                                  |                 | mucoid             | SAMN02138624        |
| <b>BIDMC_32</b> | <b>abscess</b>  | <b>258</b> | <b>Clade 2</b> | <b>Boston Prospective</b> | <b>Aug-12</b>  | <b>wzcG565S(GGT-&gt;AGT);T567A (ACC-&gt;GCC)</b> |                 | <b>mucoid</b>      | <b>SAMN02138662</b> |

|               |                     |     |         |                       |        |                               |         |            |                  |
|---------------|---------------------|-----|---------|-----------------------|--------|-------------------------------|---------|------------|------------------|
| BIDMC_12A     | sputum              | 258 | Clade 2 | Boston Historical     | Apr-12 | <i>gndV407A</i>               |         | mucoïd     | SAMN0213863<br>3 |
| BIDMC_12<br>C | endotracheal        | 258 | Clade 2 | Boston Historical     | May-12 | <i>gndV407A</i>               |         | mucoïd     | SAMN0213863<br>5 |
| BIDMC_12B     | blood               | 258 | Clade 2 | Boston Historical     | Apr-10 | <i>gndV407A</i>               |         | mucoïd     | SAMN0213863<br>4 |
| BWH_41        | urine               | 258 | Clade 2 | Boston<br>Prospective | Sep-12 | <i>wbaP:ISKpn26; wzyC90R</i>  | 302-475 | hypomucoïd | SAMN0213860<br>3 |
| BIDMC_1       | bone tissue,<br>toe | 258 | Clade 2 | Boston Historical     | Aug-12 | <i>wzyC90R</i>                |         | mucoïd     | SAMN0213862<br>0 |
| MGH_59        | urine               | 258 | Clade 2 | Boston<br>Prospective | Apr-13 | <i>wzyC90R</i>                |         | mucoïd     | SAMN0258139<br>1 |
| MGH_67        | pleural tissue      | 258 | Clade 2 | Boston<br>Prospective | May-13 | <i>galFA64E</i>               |         | mucoïd     | SAMN0258124<br>0 |
| BIDMC_60      | peritoneal<br>fluid | 258 | Clade 2 | Boston<br>Prospective | Aug-13 | <i>galFA64E</i>               |         | mucoïd     | SAMN0258128<br>1 |
| BIDMC_68      | blood               | 258 | Clade 2 | Boston<br>Prospective | Sep-13 | <i>wbaP:ISKpn26; galFA64E</i> | 279-475 | hypomucoïd | SAMN0258128<br>9 |
| BWH_45        | tissue              | 258 | Clade 2 | Boston<br>Prospective | Sep-13 |                               |         | mucoïd     | SAMN0258125<br>5 |
| BWH_47        | tissue              | 258 | Clade 2 | Boston<br>Prospective | Sep-13 | <i>ugpI37V</i>                |         | mucoïd     | SAMN0258130<br>1 |
| BIDMC_14      | urine               | 258 | Clade 2 | Boston Historical     | Nov-09 | <i>wbaP:ISKpn26</i>           | 445-475 | hypomucoïd | SAMN0213863<br>7 |
| MGH_73        | wound deep<br>sinus | 258 | Clade 2 | Boston<br>Prospective | Jun-13 | <i>wbaP (deletion)</i>        | 141-475 | hypomucoïd | SAMN0258124<br>6 |
| MGH_31        | tissue              | 258 | Clade 2 | Boston<br>Prospective | Sep-12 |                               |         | mucoïd     | SAMN0213857<br>1 |
| MGH_79        | urine               | 258 | Clade 2 | Boston<br>Prospective | Jul-13 | <i>gtf2G219V</i>              |         | mucoïd     | SAMN0258125<br>2 |

**Supplementary Table 1 | Mutations in the capsule biosynthesis genes of clinical ST258 isolates obtained from the previously reported collection<sup>13</sup> are associated with hyper- and hypomucoïdity.** Strains investigated in this study are highlighted in bold and with a grey background. All clinical isolates are sorted in phylogenetic order according to a recent phylogenetic analysis<sup>13</sup>. Isolation site, date and collection type (prospective or historical) are indicated. Non-synonymous mutations and the resulting amino acid exchanges or deletions are indicated. Hospitals in which the strains were isolated are indicated in the strain name: BIDMC, Beth Israel Deaconess Medical Center (Boston, MA); BWH, Brigham and Woman's Hospital (Boston, MA); MGH, Massachusetts General Hospital (Boston, MA); UCI, University of California, Irvine, Medical Center (Irvine, CA). The genomes were all recently characterized<sup>13</sup> and are available in the NCBI database.

| Strain                        | Yersiniabactin  | YbST | Aerobactin | AbST | Salmochelin | SmST | rmpA | rmpA2 |
|-------------------------------|-----------------|------|------------|------|-------------|------|------|-------|
| Kleb_pneu_BIDMC_10_V1.genome  | -               | 0    | -          | 0    | -           | 0    | -    | -     |
| Kleb_pneu_BIDMC_12A_V1.genome | -               | 0    | -          | 0    | -           | 0    | -    | -     |
| Kleb_pneu_BIDMC_12B_V1.genome | -               | 0    | -          | 0    | -           | 0    | -    | -     |
| Kleb_pneu_BIDMC_12C_V1.genome | -               | 0    | -          | 0    | -           | 0    | -    | -     |
| Kleb_pneu_BIDMC_13_V1.genome  | -               | 0    | -          | 0    | -           | 0    | -    | -     |
| Kleb_pneu_BIDMC_14_V1.genome  | -               | 0    | -          | 0    | -           | 0    | -    | -     |
| Kleb_pneu_BIDMC_16_V1.genome  | -               | 0    | -          | 0    | -           | 0    | -    | -     |
| Kleb_pneu_BIDMC_18A_V1.genome | -               | 0    | -          | 0    | -           | 0    | -    | -     |
| Kleb_pneu_BIDMC_18B_V1.genome | -               | 0    | -          | 0    | -           | 0    | -    | -     |
| Kleb_pneu_BIDMC_18C_V1.genome | -               | 0    | -          | 0    | -           | 0    | -    | -     |
| Kleb_pneu_BIDMC_1_V1.genome   | -               | 0    | -          | 0    | -           | 0    | -    | -     |
| Kleb_pneu_BIDMC_2A_V1.genome  | -               | 0    | -          | 0    | -           | 0    | -    | -     |
| Kleb_pneu_BIDMC_32_V1.genome  | -               | 0    | -          | 0    | -           | 0    | -    | -     |
| Kleb_pneu_BIDMC_34_V1.genome  | -               | 0    | -          | 0    | -           | 0    | -    | -     |
| Kleb_pneu_BIDMC_42a_V1.genome | -               | 0    | -          | 0    | -           | 0    | -    | -     |
| Kleb_pneu_BIDMC_42b_V1.genome | -               | 0    | -          | 0    | -           | 0    | -    | -     |
| Kleb_pneu_BIDMC_45_V1.genome  | -               | 0    | -          | 0    | -           | 0    | -    | -     |
| Kleb_pneu_BIDMC_4_V1.genome   | -               | 0    | -          | 0    | -           | 0    | -    | -     |
| Kleb_pneu_BIDMC_54_V1.genome  | -               | 0    | -          | 0    | -           | 0    | -    | -     |
| Kleb_pneu_BIDMC_5_V1.genome   | -               | 0    | -          | 0    | -           | 0    | -    | -     |
| Kleb_pneu_BIDMC_60_V1.genome  | -               | 0    | -          | 0    | -           | 0    | -    | -     |
| Kleb_pneu_BIDMC_68_V1.genome  | -               | 0    | -          | 0    | -           | 0    | -    | -     |
| Kleb_pneu_BIDMC_7A_V1.genome  | -               | 0    | -          | 0    | -           | 0    | -    | -     |
| Kleb_pneu_BIDMC_7B_V1.genome  | -               | 0    | -          | 0    | -           | 0    | -    | -     |
| Kleb_pneu_BWH_22_V1.genome    | -               | 0    | -          | 0    | -           | 0    | -    | -     |
| Kleb_pneu_BWH_36_V1.genome    | -               | 0    | -          | 0    | -           | 0    | -    | -     |
| Kleb_pneu_BWH_41_V1.genome    | -               | 0    | -          | 0    | -           | 0    | -    | -     |
| Kleb_pneu_BWH_45_V1.genome    | ybt 17; ICEKp10 | 247  | -          | 0    | -           | 0    | -    | -     |
| Kleb_pneu_BWH_47_V1.genome    | ybt 17; ICEKp10 | 251  | -          | 0    | -           | 0    | -    | -     |
| Kleb_pneu_MGH_29_V1.genome    | -               | 0    | -          | 0    | -           | 0    | -    | -     |
| Kleb_pneu_MGH_31_V1.genome    | -               | 0    | -          | 0    | -           | 0    | -    | -     |
| Kleb_pneu_MGH_45_V1.genome    | -               | 0    | -          | 0    | -           | 0    | -    | -     |
| Kleb_pneu_MGH_51_V1.genome    | -               | 0    | -          | 0    | -           | 0    | -    | -     |
| Kleb_pneu_MGH_59_V1.genome    | -               | 0    | -          | 0    | -           | 0    | -    | -     |
| Kleb_pneu_MGH_67_V1.genome    | -               | 0    | -          | 0    | -           | 0    | -    | -     |
| Kleb_pneu_MGH_71_V1.genome    | -               | 0    | -          | 0    | -           | 0    | -    | -     |
| Kleb_pneu_MGH_73_V1.genome    | ybt 17; ICEKp10 | 251  | -          | 0    | -           | 0    | -    | -     |
| Kleb_pneu_MGH_79_V1.genome    | -               | 0    | -          | 0    | -           | 0    | -    | -     |
| Kleb_pneu_UCI_13_V1.genome    | -               | 0    | -          | 0    | -           | 0    | -    | -     |

|                            |                 |     |   |   |   |   |   |   |
|----------------------------|-----------------|-----|---|---|---|---|---|---|
| Kleb_pneu_UCI_19_V1.genome | -               | 0   | - | 0 | - | 0 | - | - |
| Kleb_pneu_UCI_1_V1.genome  | ybt 17; ICEKp10 | 272 | - | 0 | - | 0 | - | - |
| Kleb_pneu_UCI_21_V1.genome | -               | 0   | - | 0 | - | 0 | - | - |
| Kleb_pneu_UCI_22_V1.genome | -               | 0   | - | 0 | - | 0 | - | - |
| Kleb_pneu_UCI_33_V1.genome | -               | 0   | - | 0 | - | 0 | - | - |
| Kleb_pneu_UCI_37_V1.genome | ybt 17; ICEKp10 | 266 | - | 0 | - | 0 | - | - |
| Kleb_pneu_UCI_38_V1.genome | ybt 17; ICEKp10 | 267 | - | 0 | - | 0 | - | - |
| Kleb_pneu_UCI_41_V1.genome | ybt 17; ICEKp10 | 267 | - | 0 | - | 0 | - | - |
| Kleb_pneu_UCI_43_V1.genome | ybt 17; ICEKp10 | 264 | - | 0 | - | 0 | - | - |
| Kleb_pneu_UCI_44_V1.genome | ybt 17; ICEKp10 | 264 | - | 0 | - | 0 | - | - |
| Kleb_pneu_UCI_55_V1.genome | ybt 17; ICEKp10 | 268 | - | 0 | - | 0 | - | - |
| Kleb_pneu_UCI_59_V1.genome | -               | 0   | - | 0 | - | 0 | - | - |
| Kleb_pneu_UCI_61_V1.genome | -               | 0   | - | 0 | - | 0 | - | - |
| Kleb_pneu_UCI_63_V1.genome | -               | 0   | - | 0 | - | 0 | - | - |
| Kleb_pneu_UCI_67_V1.genome | -               | 0   | - | 0 | - | 0 | - | - |

**Supplementary Table 2 | The previously reported collection of ST258 isolates<sup>13</sup> does not include isolates harboring the *rmpA/A2* and aerobactin genes.** Other virulence factors found in hypervirulent strains are also listed (the siderophores yersiniabactin and salmochelin). The presence of colibactin correlated with the presence of yersiniabactin. All strains shown were recently screened for the presence of hypervirulence genes in a recent study on the global prevalence of hypervirulence-associated genes<sup>12</sup>. Integrative conjugative element (ICE) and yersiniabactin (ybt) type and the resulting sequence type (YbST) indicated.

| Source | Isolation site | Total CFUs             | wzc mutation | % Hypercapsule |
|--------|----------------|------------------------|--------------|----------------|
| Mouse  | Abscess 1      | 5x10 <sup>4</sup> / ml | G565R        | 7              |
| Mouse  | Abscess 2      | 3x10 <sup>4</sup> / ml | A535E        | 3              |

**Supplementary Table 3 | wzc mutants emerge from mice infected with UCI\_38.** Hypercapsule mutants were isolated from 2 out of 13 abdominal abscesses formed in the outer peritoneum and abdominal wall of 25 transurethrally infected TLR4-deficient mice (C3H/HeJ), which were used as hosts because they prolonged infections caused by UCI\_38 (Extended Data Fig. 4f). The hypercapsule mutants could be easily identified by their hypermucoïd colony morphology and a positive string-test. At least two colonies were analyzed for the presence of mutations in *wzc*. The first abscess (abscess 1) harbored a subpopulation of hypercapsule mutants that represented 7% of the total abscess population and contained the same amino acid position in *wzc* (G565R) that occurred in the hypervirulent, clinical isolate BIDMC\_13. The other abscess (abscess 2) harbored a subpopulation of hypercapsule mutants that represented 3% of the total abscess population and contained a A535E mutation in *wzc* (which we also have confirmed to be hypercapsule conferring, Extended Data Figs 3b,c). The mutant populations could not be detected in the inoculum of 10<sup>7</sup> wild-type UCI\_38 by visual inspection of at least 500 colonies grown from the inoculum (detection limit 0.2%), and by deep sequencing of *wzc*, suggesting that the mutants had at the very least been positively selected during the infection and possibly generated *in vivo*.

| Strain          | Biosample    | Geographic location | Isolation_source | Collection_date | MLST   | KPC      | Wzc mutation |
|-----------------|--------------|---------------------|------------------|-----------------|--------|----------|--------------|
| BIDMC 13        | SAMN02138636 | USA: Boston, MA     | Blood            | 2009            | ST-258 | blaKPC-3 | G565S        |
| BIDMC 16        | SAMN02138639 | USA: Boston, MA     | Blood            | 2009            | ST-258 | blaKPC-3 | G565S        |
| BIDMC 32        | SAMN02138662 | USA: Boston, MA     | Abscess          | 2012            | ST-258 | blaKPC-3 | G565S        |
| CHS124          | SAMN03280267 | USA: North Carolina | Drainage         | 2014            | ST-258 | blaKPC-3 | L74H         |
| CHS133          | SAMN03280276 | USA: North Carolina | Rectal swab      | 2014            | ST-258 | blaKPC-3 | L74H         |
| CHS135          | SAMN03280278 | USA: North Carolina | Rectal swab      | 2014            | ST-258 | blaKPC-3 | L74H         |
| CHS142          | SAMN03280285 | USA: North Carolina | Urine            | 2014            | ST-258 | blaKPC-3 | G565A        |
| CHS147          | SAMN03280289 | USA: North Carolina | Rectal swab      | 2014            | ST-258 | blaKPC-3 | L74H         |
| CRK0067         | SAMN06812607 | USA: Ohio           | Blood            | 2013            | ST-258 | blaKPC-3 | G565C        |
| EuSCAPE_IT005   | SAMEA3538566 | Italy               | Urine            | 2013            | ST-512 | blaKPC-3 | L74P         |
| EuSCAPE_IT024   | SAMEA3538585 | Italy               | Urine            | 2013            | ST-512 | blaKPC-3 | G565D        |
| EuSCAPE_IT096   | SAMEA3729931 | Italy               | Blood            | 2013            | ST-512 | blaKPC-3 | G565C        |
| KP04C62         | SAMN05730643 | Italy: Turin        | Blood            | 2011            | ST-512 | blaKPC-3 | L74P         |
| KPN_KPC_HUG_07  | SAMN06335643 | Switzerland:Geneva  | Blood            | 2015            | ST-512 | blaKPC-3 | L74P         |
| KPN_KPC_HUG_08  | SAMN06293083 | Switzerland:Geneva  | Hematoma         | 2015            | ST-512 | blaKPC-3 | L74P         |
| KPN_KPC_HUG_09  | SAMN06293086 | Switzerland:Geneva  | Urine            | 2015            | ST-512 | blaKPC-3 | L74P         |
| KPN_KPC_HUG_10  | SAMN06293090 | Switzerland:Geneva  | Feces            | 2015            | ST-512 | blaKPC-3 | L74P         |
| KPN_KPC_HUG_11  | SAMN06293102 | Switzerland:Geneva  | Feces            | 2015            | ST-512 | blaKPC-3 | L74P         |
| KPN_KPC_HUG_13  | SAMN06293116 | Switzerland:Geneva  | Blood            | 2015            | ST-512 | blaKPC-3 | L74P         |
| MNCRE53         | SAMN06067844 | USA:Minnesota       | Wound            | 2016            | ST-258 | blaKPC-2 | L74H         |
| 30660/NJST258_1 | SAMN03081502 | USA                 | Urine            | 2010            | ST-258 | blaKPC-3 | A531G        |
| 39911           | SAMN06218077 | USA                 | Blood            | 2013            | ST-258 | blaKPC-3 | P533T        |
| 41959           | SAMN06218063 | USA                 | Blood            | 2013            | ST-258 | blaKPC-3 | P533T        |
| 44817           | SAMN06218033 | USA                 | Blood            | 2013            | ST-258 | blaKPC-3 | A531P        |
| 44830           | SAMN06218119 | USA                 | Blood            | 2013            | ST-258 | blaKPC-3 | DelY703-G704 |
| 45708           | SAMN06218113 | USA                 | Blood            | 2013            | ST-258 | blaKPC-3 | DelY703-G704 |
| ATCC BAA-1705   | SAMN02471470 |                     | Urine            |                 | ST-258 | blaKPC-2 | T538A        |
| CHS 08          | SAMN02581310 | USA: North Carolina | Urine            | 2013            | ST-258 | blaKPC-3 | Y714L        |
| CHS 80          | SAMN02581382 | USA: North Carolina | Urine            | 2013            | ST-258 | blaKPC-3 | A531G        |
| CHS123          | SAMN03280266 | USA                 |                  | 2014            | ST-258 | blaKPC-3 | S532N        |
| CHS98           | SAMN03280241 | USA                 |                  | 2014            | ST-258 | blaKPC-3 | A531G        |
| CRK0008         | SAMN06812666 | USA: Unknown        | Blood            | 2016            | ST-258 | blaKPC-3 | A531V        |
| CRK0013         | SAMN06812661 | USA: Michigan       | Blood            | 2014            | ST-258 | blaKPC-3 | A531V        |
| CRK0104         | SAMN05956150 | USA: North Carolina | Urine            | 2014            | ST-258 | blaKPC-3 | P533S        |
| CRK0168         | SAMN05956086 | USA: Ohio           | Urine            | 2013            | ST-258 | blaKPC-3 | Y714H        |
| CRK0174         | SAMN05956080 | USA: Ohio           | Urine            | 2012            | ST-258 | blaKPC-3 | Y714H        |
| CRK0211         | SAMN08579700 | USA: Ohio           | Urine            | 2013            | ST-258 | blaKPC-3 | Y714H        |
| EuSCAPE_IL011   | SAMEA3729925 | Israel              | Urine            | 2013            | ST-512 | blaKPC-3 | D561V        |
| EuSCAPE_IL069   | SAMEA3729926 | Israel              | Blood            | 2013            | ST-512 | blaKPC-3 | D559E        |

**Supplementary Table 4 | Hypercapsule mutants have emerged repeatedly in ST258 clade 2 and are geographically diverse based on the NCBI database.** 966 genomes were analyzed for the presence of *wzc* mutations. *wzc* SNPs occurring in amino acid positions that were confirmed to confer a hypercapsule in this study are highlighted in red. Mutations, occurring in close proximity to confirmed hypercapsule conferring mutations (Extended Data Table 3b), in essential regulatory elements of Wzc (Walker A and extended Walker A' site, and the tyrosine cluster, Extended Data Figure 3e) are highlighted in yellow. Hypercapsule mutants found in outbreaks are highlighted in grey. A *wzc*L74P mutant caused an outbreak at a hospital in Geneva (Switzerland)<sup>31</sup>, while a L74H mutant caused an outbreak in North Carolina (USA)<sup>32</sup>. ST512 is a single locus variant of ST258 clade 2.



| Strain        | Biosample    | Geographic location | Isolation source  | Collection date | MLST   | KPC          | WbaP | Protein Coordinates of Reference  |
|---------------|--------------|---------------------|-------------------|-----------------|--------|--------------|------|-----------------------------------|
| CRK0256       | SAMN08579655 | USA: Ohio           | Urine             | 2012            | ST-258 | blaKPC-2     | 0    |                                   |
| CRK0163       | SAMN05956091 | USA: Michigan       | Urine             | 2013            | ST-258 | blaKPC-3     | 0    |                                   |
| BIDMC 54      | SAMN02581275 | USA: Boston         | Urine             | 2013            | ST-258 | blaKPC-3     | 0    |                                   |
| kpneu042      | SAMEA4916114 | Switzerland         |                   | 2010            | ST-512 | blaKPC-3     | 0    | 8-51,53-473                       |
| kpneu056      | SAMEA4916131 | Switzerland         |                   | 2012            | ST-512 | Not detected | 0    | 8-476                             |
| kpneu001      | SAMEA4916025 | Switzerland         |                   | 2013            | ST-512 | blaKPC-3     | 0    | 7-87,94-418,424-476               |
| OC217         | SAMN04075791 | USA: Chicago        | Blood             | 2010            | ST-258 | blaKPC-3     | 0    | 39-476                            |
| EuSCAPE_IT086 | SAMEA3515115 | Italy               | Wound             | 2013            | ST-512 | blaKPC-3     | 0    | 27-476                            |
|               | SAMN06917607 | Italy               | Urine             | 2012            | ST-512 | blaKPC-3     | 0    | 11-476                            |
| CRK0008       | SAMN06812666 | USA                 | Blood             | 2016            | ST-258 | blaKPC-3     | 0    | 14-476                            |
| CRK0047       | SAMN06812627 | USA: Ohio           | Blood             | 2013            | ST-258 | blaKPC-3     | 0    | 14-476                            |
| EuSCAPE_IT335 | SAMEA3538703 | Italy               | Urine             | 2013            | ST-512 | blaKPC-3     | 0    | 207-476                           |
| MGH153        | SAMN04521902 | USA: Boston         | Urine             | 2015            | ST-258 | Not detected | 0    | 181-476                           |
| kpneu026      | SAMEA4916078 | Switzerland         |                   | 2012            | ST-512 | blaKPC-3     | 0    | 7-418,357-450,450-476             |
| kpneu024      | SAMEA4916075 | Switzerland         |                   | 2013            | ST-512 | blaKPC-3     | 0    | 7-87,94-418,421-476               |
| EuSCAPE_IT030 | SAMEA3538591 | Italy               | Urine             | 2013            | ST-512 | blaKPC-3     | 0    | 21-476                            |
| MNCRE82       | SAMN06107577 | USA:MN              | Urine             | 2013            | ST-258 | blaKPC-2     | 0    | 27-249,309-476                    |
| kpneu051      | SAMEA4916126 | Switzerland         |                   | 2011            | ST-258 | blaKPC-19    | 0    | 8-51,53-75,75-287,288-450,449-476 |
| 1520(3-B)     | SAMN05301552 | USA                 | BAL               | 2015/2016       | ST-258 | blaKPC-31    | 28   | 1-28,31-476                       |
|               | SAMN06917643 | Italy               | Rectal swab       | 2013            | ST-512 | blaKPC-3     | 29   | 1-29,33-476                       |
| kpneu054      | SAMEA4916129 | Switzerland         |                   | 2014            | ST-512 | blaKPC-3     | 34   | 1-34,31-375,370-387,387-476       |
| PEC-KPC       | SAMN09269478 | Spain: Madrid       |                   | 2013            | ST-258 | blaKPC-3     | 66   | 1-66,65-476                       |
| UHKPC69       | SAMN02142026 |                     |                   |                 | ST-258 | blaKPC-3     | 77   | 1-77,80-476                       |
| kpneu053      | SAMEA4916128 | Switzerland         |                   | 2013            | ST-512 | blaKPC-3     | 87   | 1-87,94-450,450-476               |
| kpneu017      | SAMEA4916064 | Switzerland         |                   | 2013            | ST-258 | blaKPC-3     | 87   | 1-87,94-476                       |
| 1010363       | SAMN10252239 | Italy               |                   | 2017            | ST-512 | blaKPC-3     | 91   | 1-91,88-476                       |
| kpneu049      | SAMEA4916124 | Switzerland         |                   | 2014            | ST-512 | blaKPC-3     | 106  | 1-106,94-418,424-476              |
| MNCRE64       | SAMN06107581 | USA:MN              | Wound             | 2012            | ST-258 | blaKPC-2     | 120  | 1-120                             |
| EuSCAPE_IT022 | SAMEA3538583 | Italy               | Respiratory Tract | 2013            | ST-512 | blaKPC-3     | 131  | 1-131,131-476                     |
| CRK0189       | SAMN05956065 | USA: Ohio           | Urine             | 2012            | ST-258 | blaKPC-3     | 131  | 1-131,131-476                     |
| ST258_FL      | SAMN03435903 | USA: Orlando        | Urine             | 2008            | ST-258 | blaKPC-3     | 133  | 1-133,131-476                     |
| BWH53         | SAMN03280381 | USA                 | Sputum            | 2014            | ST-258 | blaKPC-3     | 141  | 1-141,142-476                     |
| MGH 73        | SAMN02581246 | USA: Boston         | Wound             | 2013            | ST-258 | blaKPC-3     | 141  | 1-141,142-476                     |
| UCI 44        | SAMN02356624 | USA: Irvine, CA     | Urine             |                 | ST-258 | Not detected | 237  | 1-237,235-476                     |
| UCI 43        | SAMN02356623 | USA: Irvine, CA     | Urine             |                 | ST-258 | Not detected | 269  | 1-269,235-476                     |
| BIDMC 68      | SAMN02581289 | USA: Boston         | Blood             | 2013            | ST-258 | blaKPC-2     | 281  | 1-281,278-476                     |
| BWH 41        | SAMN02138603 |                     | Urine             |                 | ST-258 | Not detected | 301  | 1-301,300-476                     |
| EuSCAPE_IT124 | SAMEA3515153 | Italy               | Blood             | 2013            | ST-512 | blaKPC-3     | 340  | 1-340,339-476                     |
| KpVA-7        | SAMEA3108423 |                     |                   | 2011            | ST-258 | blaKPC-3     | 340  | 1-340,340-476                     |

|               |              |                 |                         |      |        |              |     |               |
|---------------|--------------|-----------------|-------------------------|------|--------|--------------|-----|---------------|
| kpneu039      | SAMEA4916110 | Switzerland     |                         | 2012 | ST-258 | blaKPC-3     | 389 | 1-34,31-476   |
| MNCRE74       | SAMN06107587 | USA:MN          | Sputum                  | 2012 | ST-258 | blaKPC-2     | 391 | 1-391,368-476 |
| EuSCAPE_IT318 | SAMEA3538686 | Italy           | Other (biopsy material) | 2013 | ST-512 | blaKPC-3     | 396 | 1-396,396-476 |
| TUM15670      | SAMD00126355 | Singapore       |                         |      | ST-258 | blaKPC-2     | 406 | 1-406,411-476 |
| CHS139        | SAMN03280282 | USA             | BAL                     | 2014 | ST-258 | blaKPC-3     | 410 | 1-410,419-476 |
| DG6099        | SAMN08399046 | Italy: Florence | Rectal swab             | 2016 | ST-512 | blaKPC-3     | 410 | 1-410,419-476 |
| DG6684        | SAMN08399047 | Italy: Florence | Rectal swab             | 2016 | ST-512 | blaKPC-3     | 410 | 1-410,419-476 |
| DG7779        | SAMN08399045 | Italy: Florence | Rectal swab             | 2016 | ST-512 | blaKPC-3     | 410 | 1-410,419-476 |
| CHS163        | SAMN03280304 | USA             | Urine                   | 2014 | ST-258 | blaKPC-3     | 410 | 1-410,419-476 |
| UCI 37        | SAMN02356617 | USA: Irvine, CA | Urine                   |      | ST-258 | blaKPC-3     | 412 | 1-412,384-476 |
| AR_0012       | SAMN04014853 |                 |                         |      | ST-258 | Not detected | 418 | 1-418,421-476 |
| kpneu004      | SAMEA4916032 | Switzerland     |                         | 2014 | ST-512 | blaKPC-3     | 418 | 1-418,421-476 |
| EuSCAPE_IT126 | SAMEA3515155 | Italy           | Urine                   | 2013 | ST-512 | blaKPC-3     | 419 | 1-419,419-476 |
| kpneu020      | SAMEA4916070 | Switzerland     |                         | 2014 | ST-512 | blaKPC-3     | 419 | 1-476         |
| BIDMC 14      | SAMN02138637 |                 | Urine                   |      | ST-258 | blaKPC-3     | 444 | 1-444,444-476 |
|               | SAMN06917611 | Italy           | Perianal swab           | 2012 | ST-512 | blaKPC-3     | 463 | 1-463         |
| MNCRE80       | SAMN06107576 | USA:MN          | Urine                   | 2013 | ST-258 | blaKPC-2     | 471 | 1-471         |

**Supplementary Table 5** | 966 genomes were analyzed for the presence of *wbaP* truncations and deletions. The length of the identified WbaP protein is shown in grey (based on open reading frame), as well as the WbaP coordinates of the reference sequence. ST512 is a single locus variant of ST258 clade 2.

|                | <b>wzc SNP</b> | <b>wild type wzc</b> |
|----------------|----------------|----------------------|
| Blood          | 16             | 176                  |
| Other          | 16             | 402                  |
| Total          | 32             | 578                  |
| <b>% Blood</b> | <b>50%</b>     | <b>30.45%</b>        |

*P*=0.0299

|                | <b>wbaP mutation</b> | <b>wild type wbaP</b> |
|----------------|----------------------|-----------------------|
| Urine          | 18                   | 231                   |
| Other          | 11                   | 350                   |
| Total          | 29                   | 581                   |
| <b>% Urine</b> | <b>62%</b>           | <b>39.80%</b>         |

*P*=0.020

**Supplementary Table 6 | Capsule mutants are clinically associated with infection sites.**

ST258/512 genomes with known infection sites (610 of 966, n=610) were analyzed for associations of hypercapsule mutants with bloodstream infections and capsule-deficient mutants with urinary tract infections. Significance was calculated with a Fisher's exact test. 28 infection-unrelated specimens (rectal swabs, feces, cutaneous swabs and handrail) were excluded from the analysis.



**Supplementary Table 7 | Capsule mutant subpopulations detected in patient specimens emerged *in vivo*.** Specimens with capsule mutant subpopulations are highlighted in red. The specimens were initially analyzed for colony forming units (CFUs) and antibiotic susceptibility, as part of the routine diagnostic procedures at the Brigham and Women's Hospital in Boston. Every specimen harbored more than 100,000 bacteria per ml at the time of initial testing. The time from specimen isolation to initial plating for CFUs is indicated, as well as the maximum amount of time (hours) that the specimens were stored at room temperature (see Methods for more details). After the identification of *K. pneumoniae* and the detection of <100,000 CFUs, the specimens were analyzed for the presence of mutants (the percentage of mutant CFUs and overall CFU numbers detected in the specimen are shown). The capacity of the capsule mutants and the reference strains (normal capsule producing isolates from the specimens) to grow in urine from a healthy donor, as well in LB medium at room temperature (24 °C) was determined (doubling time is shown and based on log growth phase). The capsule mutants did not display a growth advantage in urine or in LB medium, which taken together with the presence of at least 100,000 bacteria shortly after isolation from the patient excluded the possibility that the mutants could have emerged in the specimen. The patients with capsule mutant subpopulations all had a recurring UTI (days since the detection of *K. pneumoniae* isolates displaying the same antibiotic resistance profiles in urine specimens shown).

| Culture ID | Recurrence (days ) | Leukocytes | Catheterization                       | Notables                                                |
|------------|--------------------|------------|---------------------------------------|---------------------------------------------------------|
| UR_15      | 270; 21            | 22         | no                                    | History of UTIs starting at young age                   |
| UR_47      |                    | 122        | 62 days prior to isolation for 1 week | Mixed Gram-negative flora detected 14 days prior to UTI |
| UR_53      |                    | 140        | yes (51 days)                         |                                                         |

**Supplementary Table 8 | The capsule-deficient mutants from the prospective collection of urine specimens caused acute symptomatic UTIs.** Days of potential recurrent infection based on prior isolation of an isolate with the same antibiotic susceptibility profile shown. The presence and number of leukocytes detected in the urinalysis is shown. UR\_15 and UR\_47 caused symptomatic infection, while no symptoms were noted for UR\_53.

| Class                                   | Antibiotic                    | UR 1    | UR 2    | UR 3    | UR 4    | UR 5*  | UR 6    | UR 7    | UR 9*   | UR 10   | UR 11*  | UR 12   | UR 13   | UR 14   |
|-----------------------------------------|-------------------------------|---------|---------|---------|---------|--------|---------|---------|---------|---------|---------|---------|---------|---------|
| Carbapenems                             | Meropenem                     | <= 0.25 | <= 0.25 | <= 0.25 | <= 0.25 | >= 16  | <= 0.25 | <= 0.25 | <= 0.25 | <= 0.25 | <= 0.25 | <= 0.25 | <= 0.25 | <= 0.25 |
|                                         | Ertapenem                     | <= 0.5  | <= 0.5  | <= 0.5  | <= 0.5  |        | <= 0.5  | <= 0.5  | <= 0.5  | <= 0.5  | <= 0.5  | <= 0.5  | <= 0.5  | <= 0.5  |
| Cephalosporins                          | Ceftriaxone                   | <= 1    | <= 1    | <= 1    | <= 1    | >= 64  | <= 1    | <= 1    | >= 64   | <= 1    | >= 64   | <= 1    | >= 64   | <= 1    |
|                                         | Ceftazidime                   | <= 1    | <= 1    | <= 1    | <= 1    | >= 64  | <= 1    | <= 1    | 16      | <= 1    | >= 64   | <= 1    | 4       | <= 1    |
|                                         | Cefazolin                     | <= 4    | <= 4    | <= 4    | <= 4    | >= 64  | <= 4    | <= 4    | >= 64   | <= 4    | >= 64   | <= 4    | <= 4    | <= 4    |
|                                         | Cefepime                      | <= 1    | <= 1    | <= 1    | <= 1    | >= 64  | <= 1    | <= 1    | 32      | <= 1    | 8       | <= 1    | 2       | <= 1    |
| Penicillins + beta-lactamase inhibitors | Amoxicillin/Clavulanate       | 4       | 4       | <= 2    | <= 2    | >= 32  | <= 2    | <= 2    | >= 32   | <= 2    | >= 32   | <= 2    | 4       | <= 2    |
|                                         | Piperacillin/Tazobactam       | <= 4    | 8       | 8       | <= 4    | >= 128 | <= 4    | <= 4    | 32      | <= 4    | >= 128  | <= 4    | <= 4    | <= 4    |
| Fluoroquinolones                        | Ciprofloxacin                 | <= 0.25 | 0.5     | <= 0.25 | <= 0.25 | >= 4   | <= 0.25 | <= 0.25 | >= 4    | <= 0.25 | >= 4    | <= 0.25 | <= 0.25 | <= 0.25 |
|                                         | Levofloxacin                  | <=0.12  | 1       | <=0.12  | <=0.12  | >= 8   | <=0.12  | <=0.12  | >= 8    | <=0.12  | >= 8    | <=0.12  | <=0.12  | <=0.12  |
| Aminoglycosides                         | Amikacin                      | <= 2    | <= 2    | <= 2    | <= 2    | >= 64  | <= 2    | <= 2    | 4       | <= 2    | >= 64   | <= 2    | <= 2    | <= 2    |
|                                         | Gentamicin                    | <= 1    | <= 1    | <= 1    | <= 1    | >= 16  | <= 1    | <= 1    | >= 16   | <= 1    | <= 1    | <= 1    | <= 1    | <= 1    |
|                                         | Tobramycin                    | <= 1    | <= 1    | <= 1    | <= 1    | >= 16  | <= 1    | <= 1    | >= 16   | <= 1    | >= 16   | <= 1    | <= 1    | <= 1    |
| Tetracyclines                           | Tetracycline                  | <= 1    | 4       | <= 1    | <= 1    | >= 16  | <= 1    | <= 1    | >= 16   | <= 1    | >= 16   | <= 1    | >= 16   | 2       |
| Nitrofurans                             | Nitrofurantoin                | 128     | 256     | 64      | 64      | >= 512 | 32      | <=16    | 128     | 64      | 256     | 64      | 64      | 64      |
| Folate pathway inhibitors               | Trimethoprim/Sulfamethoxazole | >=320   | <= 20   | <= 20   | <= 20   | >=320  | <= 20   | <= 20   | >=320   | <= 20   | >=320   | <= 20   | >=320   | <= 20   |

| Class                                   | Antibiotic                    | UR_15   | UR_35*  | UR_37  | UR_41  | UR_42* | UR_43  | UR_44  | UR_45  | UR_46* | UR_47  | UR_48  | UR_50  | UR_53  |
|-----------------------------------------|-------------------------------|---------|---------|--------|--------|--------|--------|--------|--------|--------|--------|--------|--------|--------|
| Carbapenems                             | Meropenem                     | <= 0.25 | <= 0.25 | <=0.25 | <=0.25 | <=0.25 | <=0.25 | <=0.25 | <=0.25 | <=0.25 | <=0.25 | <=0.25 | <=0.25 | <=0.25 |
|                                         | Ertapenem                     | <= 0.5  | <= 0.5  | <=0.5  | <=0.5  | <=0.5  | <=0.5  | <=0.5  | <=0.5  | <=0.5  | <=0.5  | <=0.5  | <=0.5  | <=0.5  |
| Cephalosporins                          | Ceftriaxone                   | <=1     | >= 64   | <=1    | <=1    | >= 64  | <=1    | <=1    | <=1    | >= 64  | <=1    | <=1    | <=1    | <=1    |
|                                         | Ceftazidime                   | <=1     | 8       | <=1    | <=1    | 16     | <=1    | <=1    | <=1    | 16     | <=1    | <=1    | <=1    | <=1    |
|                                         | Cefazolin                     | <=4     | >= 64   | <=4    | <=4    | >= 64  | <=4    | <=4    | <=4    | >= 64  | <=4    | <=4    | <=4    | <=4    |
|                                         | Cefepime                      | <=1     | 2       | <=1    | <=1    | 4      | <=1    | <=1    | <=1    | 2      | <=1    | <=1    | <=1    | <=1    |
| Penicillins + beta-lactamase inhibitors | Amoxicillin/Clavulanate       | 8       | 16      | <=2    | <=2    | 16     | <=2    | <=2    | <=2    | 16     | 4      | <=2    | <=2    | <=2    |
|                                         | Piperacillin/Tazobactam       | 16      | 16      | 8      | <=4    | 16     | <=4    | <=4    | <=4    | 32     | 64     | <=4    | <=4    | <=4    |
| Fluoroquinolones                        | Ciprofloxacin                 | >= 4    | >= 4    | <=0.25 | <=0.25 | >= 4   | <=0.25 | <=0.25 | <=0.25 | >= 4   | <=0.25 | <=0.25 | <=0.25 | <=0.25 |
|                                         | Levofloxacin                  | >= 8    | >= 8    | <=0.12 | <=0.12 | >= 8   | <=0.12 | <=0.12 | <=0.12 | >= 8   | <=0.12 | <=0.12 | <=0.12 | <=0.12 |
| Aminoglycosides                         | Amikacin                      | <= 2    | <= 2    | <=2    | <=2    | 4      | <=2    | <=2    | <=2    | <=2    | <=2    | <=2    | <=2    | <=2    |
|                                         | Gentamicin                    | <=1     | >= 16   | <=1    | <=1    | >= 16  | <=1    | <=1    | <=1    | >= 16  | <=1    | <=1    | <=1    | <=1    |
|                                         | Tobramycin                    | <=1     | >= 16   | <=1    | <=1    | >= 16  | <=1    | <=1    | <=1    | 8      | <=1    | <=1    | <=1    | <=1    |
| Tetracyclines                           | Tetracycline                  | >= 16   | >= 16   | <=1    | >= 16  | <=1    | <=1    | 2      | <=1    | >= 16  | <=1    | <=1    | <=1    | <=1    |
| Nitrofurantoin                          | Nitrofurantoin                | 128     | 128     | 64     | 64     | 128    | 64     | 64     | 128    | 128    | 64     | 32     | <=16   | <=16   |
| Folate pathway inhibitors               | Trimethoprim/Sulfamethoxazole | >=320   | >=320   | <=20   | <=20   | >=320  | <=20   | <=20   | <=20   | >=320  | <=20   | <=20   | <=20   | <=20   |



| Class                                   | Antibiotic                    | UR 54   | UR 55   | UR 56  | UR 57  |
|-----------------------------------------|-------------------------------|---------|---------|--------|--------|
| Carbapenems                             | Meropenem                     | <= 0.25 | <= 0.25 | <=0.25 | <=0.25 |
|                                         | Ertapenem                     | <= 0.5  | <= 0.5  | <=0.5  | <=0.5  |
| Cephalosporins                          | Ceftriaxone                   | <=1     | <=1     | <=1    | >= 64  |
|                                         | Ceftazidime                   | <=1     | <=1     | <=1    | 16     |
|                                         | Cefazolin                     | <=4     | <=4     | <=4    | >= 64  |
|                                         | Cefepime                      | <=1     | <=1     | <=1    | 2      |
| Penicillins + beta-lactamase inhibitors | Amoxicillin/Clavulanate       | <=2     | <=2     | <=2    | 8      |
|                                         | Piperacillin/Tazobactam       | <=4     | <=4     | <=4    | <=4    |
| Fluoroquinolones                        | Ciprofloxacin                 | <=0.25  | <=0.25  | <=0.25 | 0.5    |
|                                         | Levofloxacin                  | <=0.12  | <=0.12  | <=0.12 | 1      |
| Aminoglycosides                         | Amikacin                      | <= 2    | <= 2    | <=2    | <=2    |
|                                         | Gentamicin                    | <=1     | <=1     | <=1    | <=1    |
|                                         | Tobramycin                    | <=1     | <=1     | <=1    | <=1    |
| Tetracyclines                           | Tetracycline                  | >= 16   | <=1     | <=1    | >= 16  |
| Nitrofurans                             | Nitrofurantoin                | 64      | 32      | 64     | 128    |
| Folate pathway inhibitors               | Trimethoprim/Sulfamethoxazole | <=20    | <=20    | <=20   | >=320  |

**Supplementary Table 9 | Urine specimens with capsule mutant subpopulations are associated with multidrug-resistant infections.** 30 urine specimens were prospectively collected at the Brigham and Women's Hospital in Boston in 2018. Antibiotic susceptibility of the clinical isolates was determined using the automated broth microdilution method performed on a Vitek2 instrument (Biomérieux). The minimum inhibitory concentrations (MICs) are shown. Specimens with subpopulations of capsule mutants are highlighted in yellow, specimens with homogenous capsule-deficient subpopulations are highlighted in black. MICs determined to be intermediate or fully resistant are highlighted in red. The limit of detection of clones displaying altered mucoidity is 0.2-0.5%. Multidrug-resistance (MDR) is defined as resistance (including intermediate resistance) to at least 1 agent in all but 2 or fewer classes of antibiotics (similarly to a recent definition by the CDC and ECDC<sup>65</sup>), as determined in UR\_5, UR\_9, UR\_11, UR\_35, UR\_42 and UR\_46. (indicated with an asterisk). According to this definition, 20% of the isolates are MDR (6/30). 10% (3/30) of the specimens harbored homogenous hypomuroid populations, while another 10% (3/30) of the specimens harbored heterogenous subpopulations of capsule mutants. Subpopulations of capsule mutants occurred in 50 % (3/6) of the MDR specimens.

| Specimen | Comparison          | SNPs | # shared positions | Identity | SNPs to reference             | Mutation in cps operon |
|----------|---------------------|------|--------------------|----------|-------------------------------|------------------------|
| UR_5     | normal vs hyper     | 44   | 5145900            | 99.999%  | 133 (normal),107 (deficient)  | wzcA539D               |
| UR_5     | normal vs deficient | 43   | 5149727            | " "      | 133 (normal), 106 (deficient) | wbaPD435V              |
| UR_11    | normal vs hyper     | 45   | 5174997            | " "      | 803 (normal), 779 (hyper)     | wzcL74P                |
| UR_35    | Normal vs hyper     | 5    | 5282340            | " "      | 965 (normal), 967 (hyper)     | wzcG494C, G713fs       |

**Supplementary Table 10 | High confidence SNPs observed between normal and capsule mutant subpopulations in urine specimens.** The total number of identified SNPs is shown, as well as the sequence similarity (#of shared positions, identity) of representative capsule mutants vs normal capsule producing strains from each specimen

| Name           | Sequence                                            |
|----------------|-----------------------------------------------------|
| wzc_ST258-fw   | CCAAGAGCTCTCATGTTTAACTCGATTCTAGTAGTTTGTA            |
| wzc_ST258-rv   | CGTCTGGTACCTTACTTATTATCTTTATAAGAATAGCCGTAATAATTAGCC |
| wzc_UR_5-fw    | CCAAGAGCTCTCATGTTTAGTACAATATAATTGTTGCAC             |
| wzc_UR_5-rv    | CGTCTGGTACCCTATTTTTATCTGAATATGAATAATCG              |
| wzc_UR_11-fw   | GGTGAGCTCCTAATCCATCAAGCTGGT                         |
| wzc_UR_11-rv   | GCGGGTACCCCTCTTGGATTTCACAT                          |
| wbaP_UCI_38-fw | GAGCTCGGTACCGAGTTATATGAGAGGTCACATGGCG               |
| wbaP_UCI_38-rv | GCATGCCTGCAGTTAATATGCCCCGTCCTTCTTAAC                |

**Supplementary Table 11 | Primers used to clone *wzc* genes from clinical isolates, and *wbaP*, in pBAD33.**

| Specimen       | Total reads | ST  | Reference | Identifier    | Kmer similarity score | % Reads mapped to reference |
|----------------|-------------|-----|-----------|---------------|-----------------------|-----------------------------|
| UR_5 (normal)  | 21,161,710  | 14  | U25       | GCA_001463165 | 0.97                  | 87.6                        |
| UR_5 (hyper)   | 19,392,932  | 14  | U25       | GCA_001463165 | 0.97                  | 91.3                        |
| UR_5 (hypo)    | 14,173,892  | 14  | U25       | GCA_001463165 | 0.97                  | 79.5                        |
| UR_11 (normal) | 28133162    | 258 | KPNIH33   | GCA_000775375 | 0.95                  | 90.8                        |
| UR_11 (hyper)  | 34604838    | 258 | KPNIH33   | GCA_000775375 | 0.95                  | 91.9                        |
| UR_35 (normal) | 15896215    | 307 | MGH_43    | GCA_000567685 | 0.94                  | 92.0                        |
| UR_35 (hyper)  | 14529272    | 307 | MGH_43    | GCA_000567685 | 0.94                  | 93.8                        |

**Supplementary Table 13. Reference sequences used to identify SNPs in hyper- and hypomuroid subpopulations.** The total number of reads obtained for each specimen, as well as the sequence type (ST) and the identified reference sequence (based on Kmer similarity) is shown.
